# Supplementary material
Source: Springer Nature journal article supplement (https://www.springermedizin.de/resource/supplementary/12936_2010_1405_MOESM3_ESM.pdf/9549724)

2005 Observed Hourly Rainfall

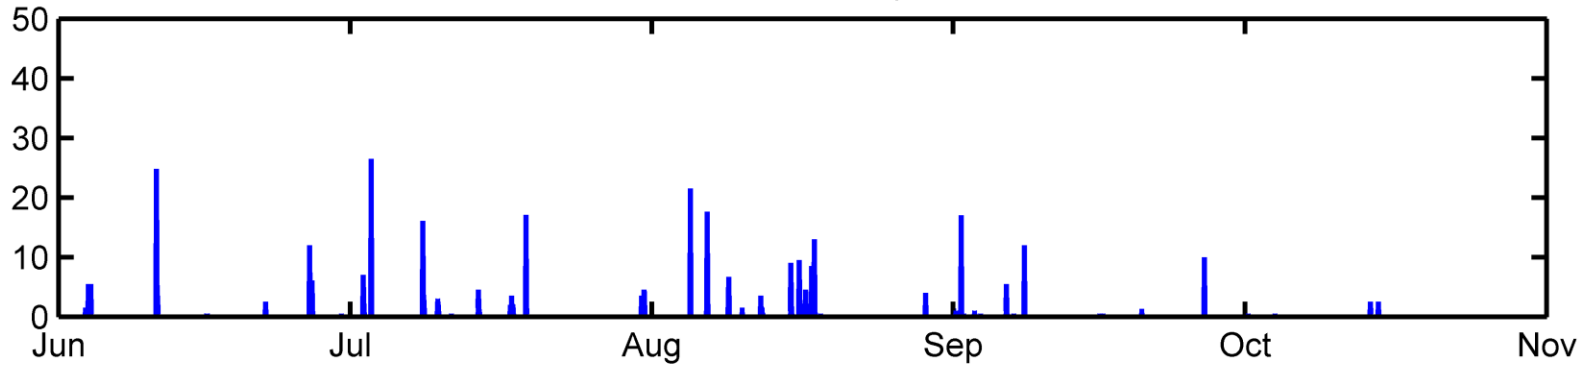

2006 Observed Hourly Rainfall

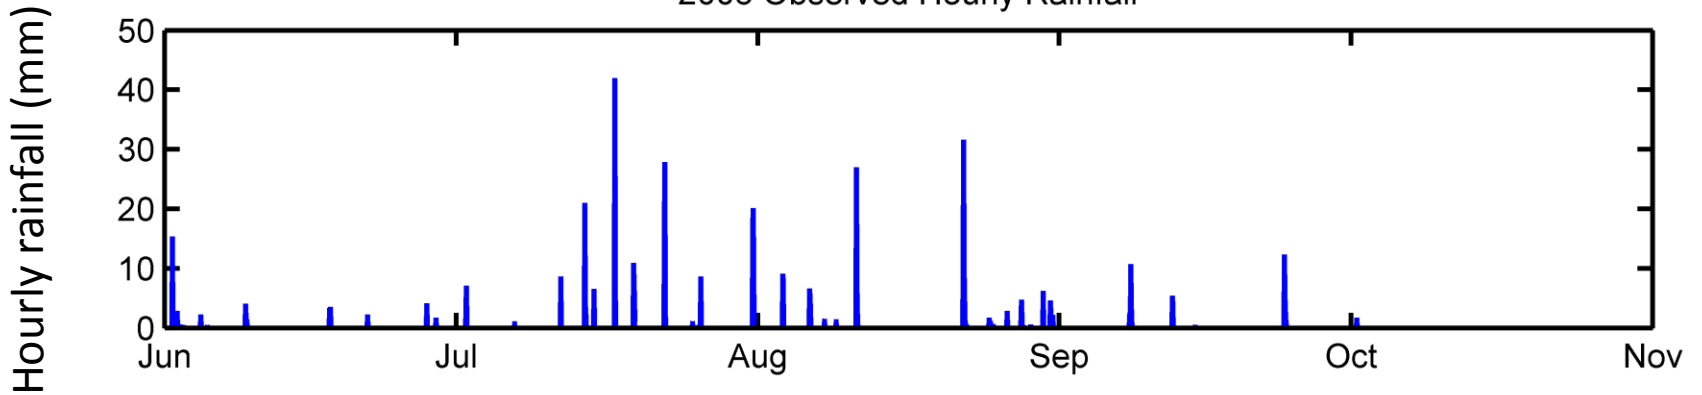

2007 Observed Hourly Rainfall

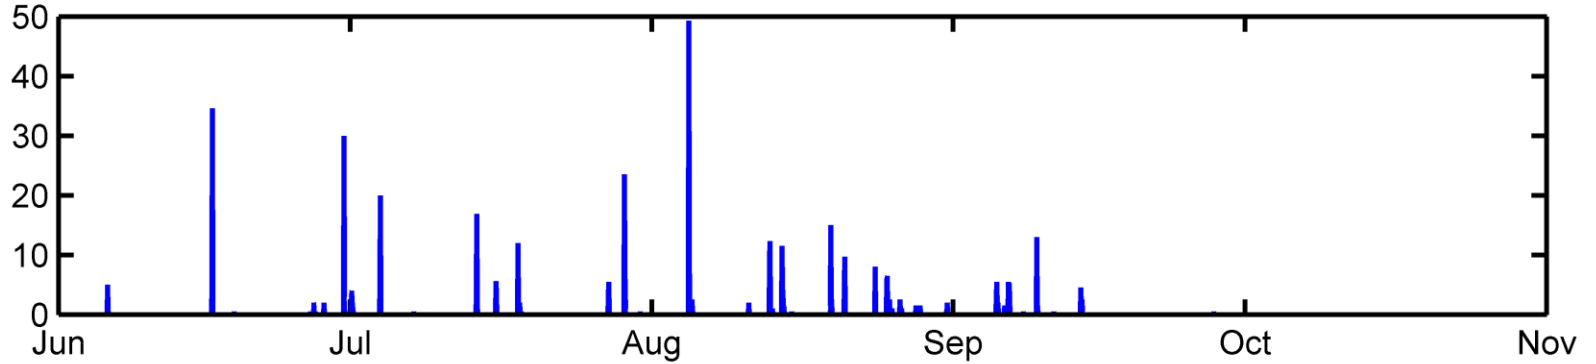

Supplement: MOESM3 [file 9549724]
